# Supplementary material for: Generating Trust in Participatory Research on Plasmodium knowlesi Malaria: A Study with Rural Community Gatekeepers during the COVID-19 Pandemic
Source: Int J Environ Res Public Health. 2022 Nov 26;19(23):15764. doi: 10.3390/ijerph192315764 (PMC9737837; doi:10.3390/ijerph192315764)
Supplement: Supplementary file 1 [file ijerph-19-15764-s001.zip › Supplementary File S1. P. knowlesi cases year 2021 underphc.xlsx]

## Sheet: Sheet1
Village name	Number of cases	Total population	Incidence per 1000
Tinukadan	5	113	44.24
Membatu Laut Baru	6	164	36.58
Membatu Darat	10	186	53.76
Manduri	5	141	35.46
Paradason Darat	5	173	28.9
Nangka	2	231	8.65
Tagumamal Darat	4	55	72.72
Onduan	2	166	12.04							Note:	incidence > 30/1000 population
Lotong	1	220	4.54								incidence < 30/1000 population
Pinampang B	6	71	84.5
Lokoton	2	123	16.26
Keindangan	4	175	22.85
Dumpiring	6	266	22.57
Paradason	10	59	169.49
Tagumamal Laut	2	75	26.67
Nangaran Darat	2	167	11.97
Malamam	2	199	10.05
Kudungkung	2	97	20.61
Pinorat	1	236	4.24
Mogong	3	196	15.3
Binuvang	1	69	14.49
Lampaki	2	106	18.87
Nangaran	2	165	12.12
Biray	1	91	10.99
